# Supplementary material for: A newly identified bacterial cell-penetrating peptide that reduces the transcription of pro-inflammatory cytokines
Source: Oxford University Press journal article supplement (doi:10.1242/jcs.063016), 2010-06-16
Supplement: jcs063016-sup-063016tables1.pdf [file jcs063016-sup-063016tables1.pdf]

**Table S1. Oligonucleotides used in this study.**

| <b>Primer name</b>      | <b>Sequence (5'→3')</b>                | <b>Restriction site<br/>(underlined)</b> |
|-------------------------|----------------------------------------|------------------------------------------|
| <b>Cloning primers</b>  |                                        |                                          |
| F-yopM <sub>55</sub> -C | CTAGCTAGCGGTGAACAGAGGGAAATGGCG         | <i>NheI</i>                              |
| R-yopM <sub>55</sub> -C | CCG <u>CTCGAGCTCAAATACATCATCTTCAAG</u> | <i>XhoI</i>                              |
| F-yopM <sub>Δα2H</sub>  | CCTTTAAGCCCATGAGCTAGAACTAA             |                                          |
| R-yopM <sub>Δα2H</sub>  | GGAAATTTTCGGAGGGGCATTTTCGTTCCCA        |                                          |
| F-2αH(inv)              | GAAGATCTTCGGATGGACTCTGAACGT            |                                          |
| R-2αH(inv)              | <u>CGGGATCCGGCTTGTCGGTCCAGGCAATC</u>   | <i>BamHI</i>                             |
| F-YopE                  | CTAGCTAGC <u>AAAATATCATCATTTATTCT</u>  | <i>NheI</i>                              |
| F-YopE(2αH)             | <u>CGCGGATCCAAAATATCATCATTTATTCT</u>   | <i>BamHI</i>                             |
| R-YopE                  | <u>CCGCTCGAGCATCAATGACAGTAATTCATG</u>  | <i>XhoI</i>                              |
| F-GFP                   | <u>CGGGATCCAGTAAAGGAGAAGAACTTTTC</u>   | <i>BamHI</i>                             |
| R-GFP                   | <u>CCGCTCGAGGCCATGTGTAACCCAGCAGC</u>   | <i>XhoI</i>                              |
| <b>qRT-PCR primers</b>  |                                        |                                          |
| F-HPRT1                 | TGACCTTGATTTATTTTGCATACC               |                                          |
| R-HPRT1                 | CGAGCAAGACGTTTCAGTCCT                  |                                          |
| F-TNFα                  | CAGCCTCTTCTCCTTCCTGAT                  |                                          |
| R-TNFα                  | GCCAGAGGGCTGATTAGAGA                   |                                          |
| F-IL1β                  | CTGTCCTGCGTGTTGAAAGA                   |                                          |
| R-IL1β                  | TTGGGTAATTTTGGGATCTACA                 |                                          |
| F-IL4                   | CACCGAGTTGACCGTAACAG                   |                                          |
| R-IL4                   | GCCCTGCAGAAGGTTTCC                     |                                          |
| F-IL10                  | GATGCCTTCAGCAGAGTGAA                   |                                          |
| R-IL10                  | GCAACCCAGGTAACCTTAAA                   |                                          |
| F-IL12p35               | CACTCCAAAACCTGCTGAG                    |                                          |
| R-IL12p35               | TCTCTCAGAAGTGCAAGGGTA                  |                                          |
| F-IL-15                 | CAGATAGCCAGCCCATACAAG                  |                                          |
| R-IL-15                 | GGCTATGGCAAGG                          |                                          |
| F-IL18                  | CAACAACTATTTGTGCGCAGGA                 |                                          |
| R-IL18                  | TGCCACAAAGTTGATGCAAT                   |                                          |
