# Supplementary figures and images for: A newly identified bacterial cell-penetrating peptide that reduces the transcription of pro-inflammatory cytokines
Source: Oxford University Press journal article supplement (doi:10.1242/jcs.063016), 2010-06-16

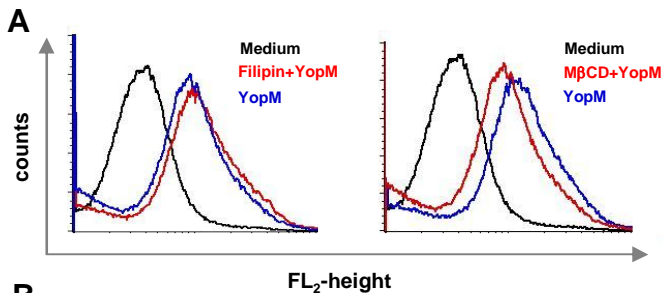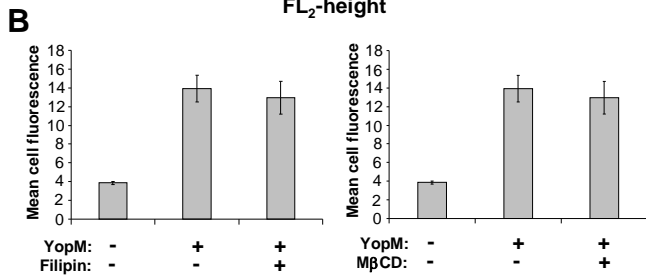

Supplement: jcs063016-sup-063016figs1.pdf [file jcs063016-sup-063016figs1.pdf]

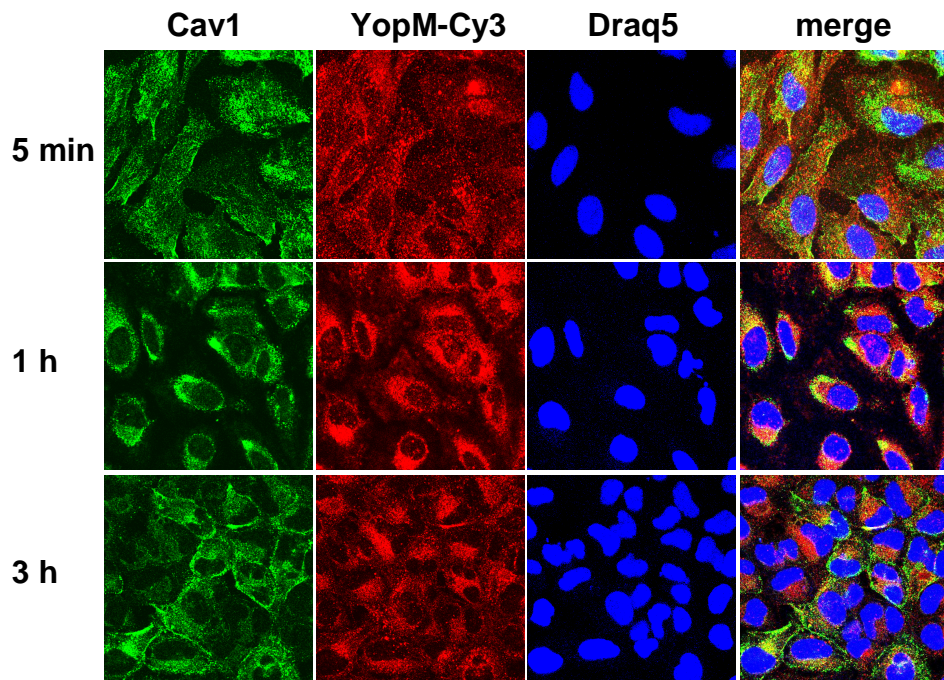

Supplement: jcs063016-sup-063016figs2.pdf [file jcs063016-sup-063016figs2.pdf]
